# Supplementary material for: Exploring the Potential of Sulfur Moieties in Compounds Inhibiting Steroidogenesis
Source: MDPI journal article supplement (doi:10.3390/biom13091349), 2023-09-05

# Exploring the potential of sulfur moieties in compounds inhibiting steroidogenesis

Tomasz M. Wróbel, Katyayani Sharma, Iole Mannella, Simonetta Oliaro-Bosso, Patrycja Nieckarz, Therina du Toit, Clarissa Daniela Voegel, Maria Natalia Rojas Velazquez, Jibira Yakubu, Anna Matveeva, Søren Therkelsen, Flemming Steen Jørgensen, Amit V Pandey, Agnese C. Pippione, Marco L. Lolli, Donatella Boschi and Fredrik Björklund

## SUPPLEMENTARY INFORMATION

### Contents

|                |    |
|----------------|----|
| NMR data.....  | 2  |
| MS data .....  | 10 |
| HPLC data..... | 14 |

## NMR data

**3a**

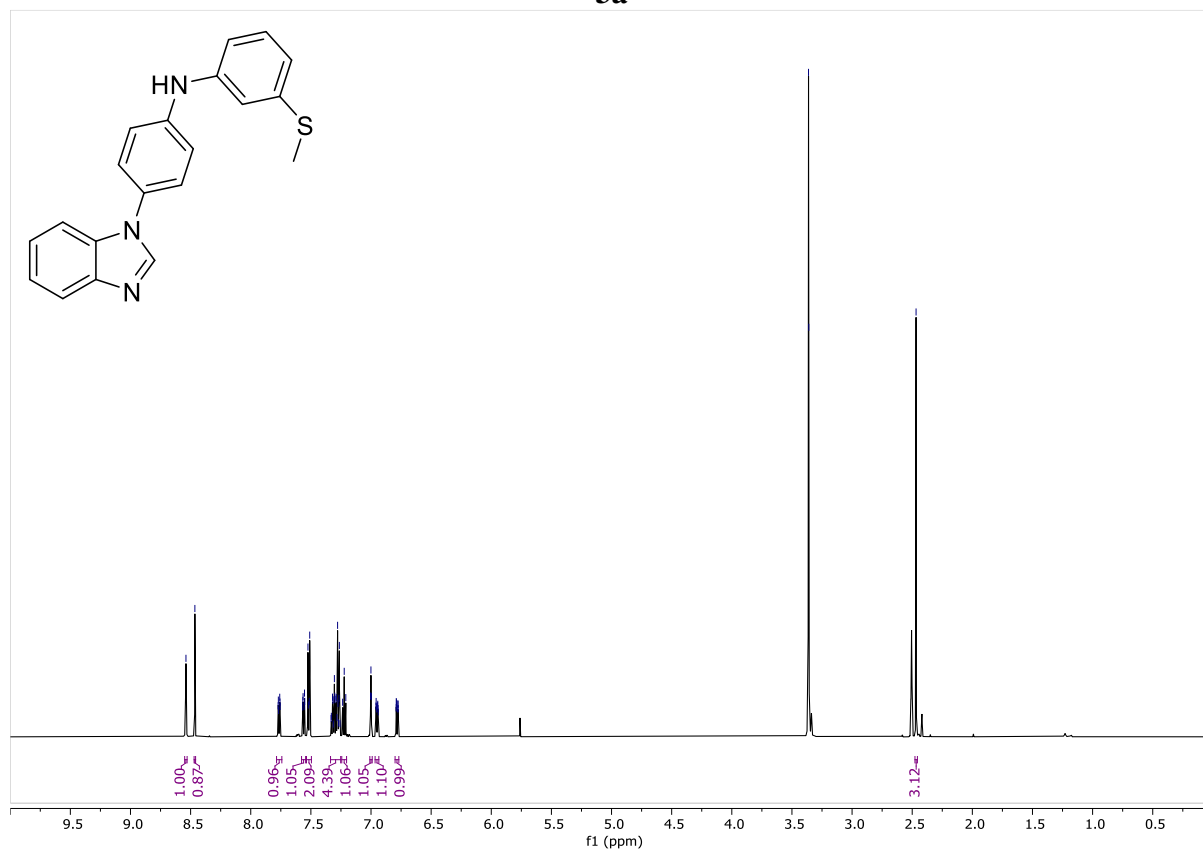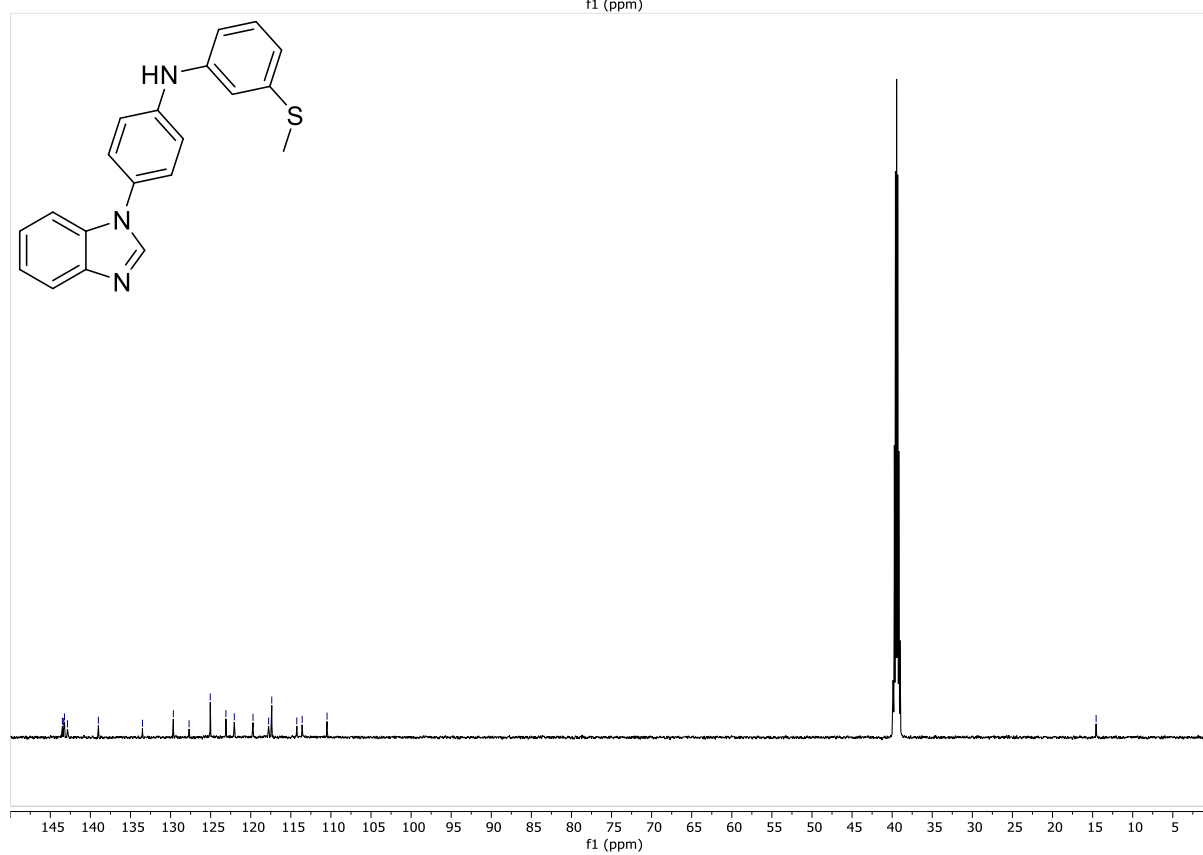

**3b**

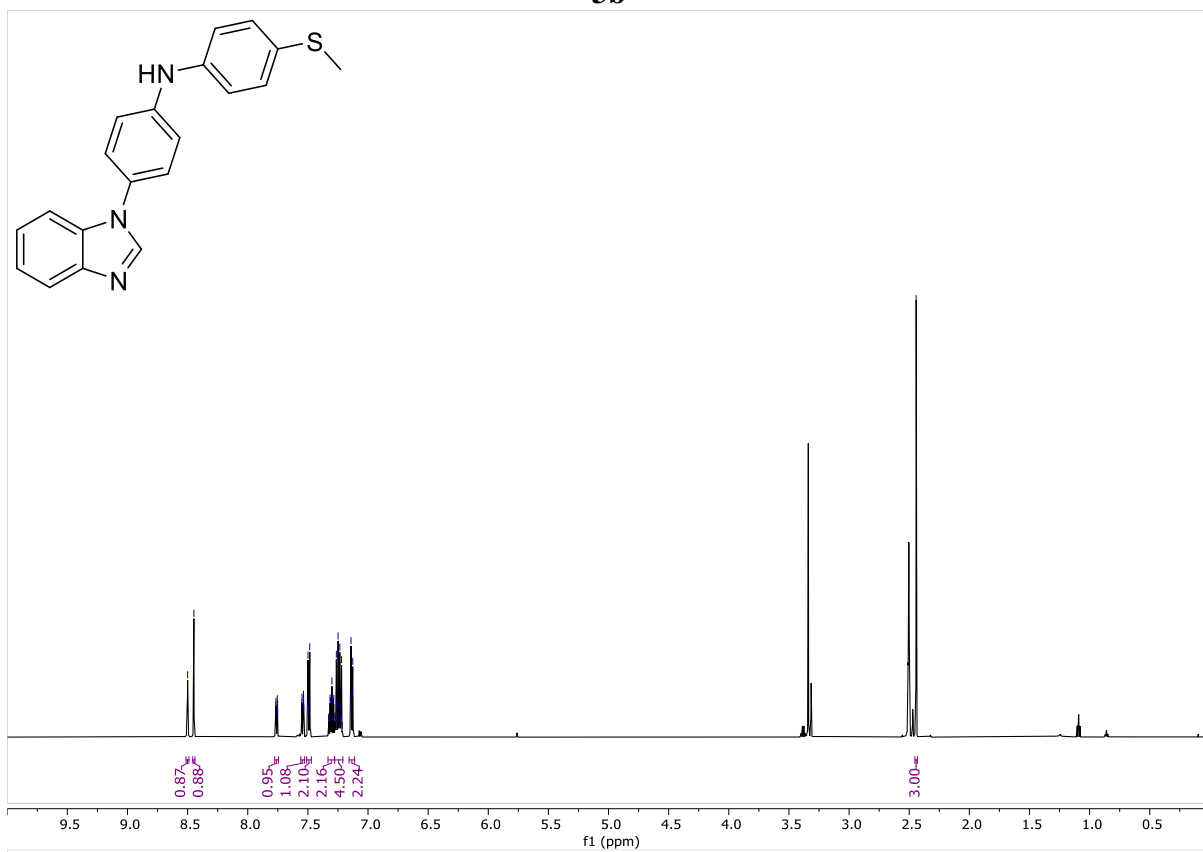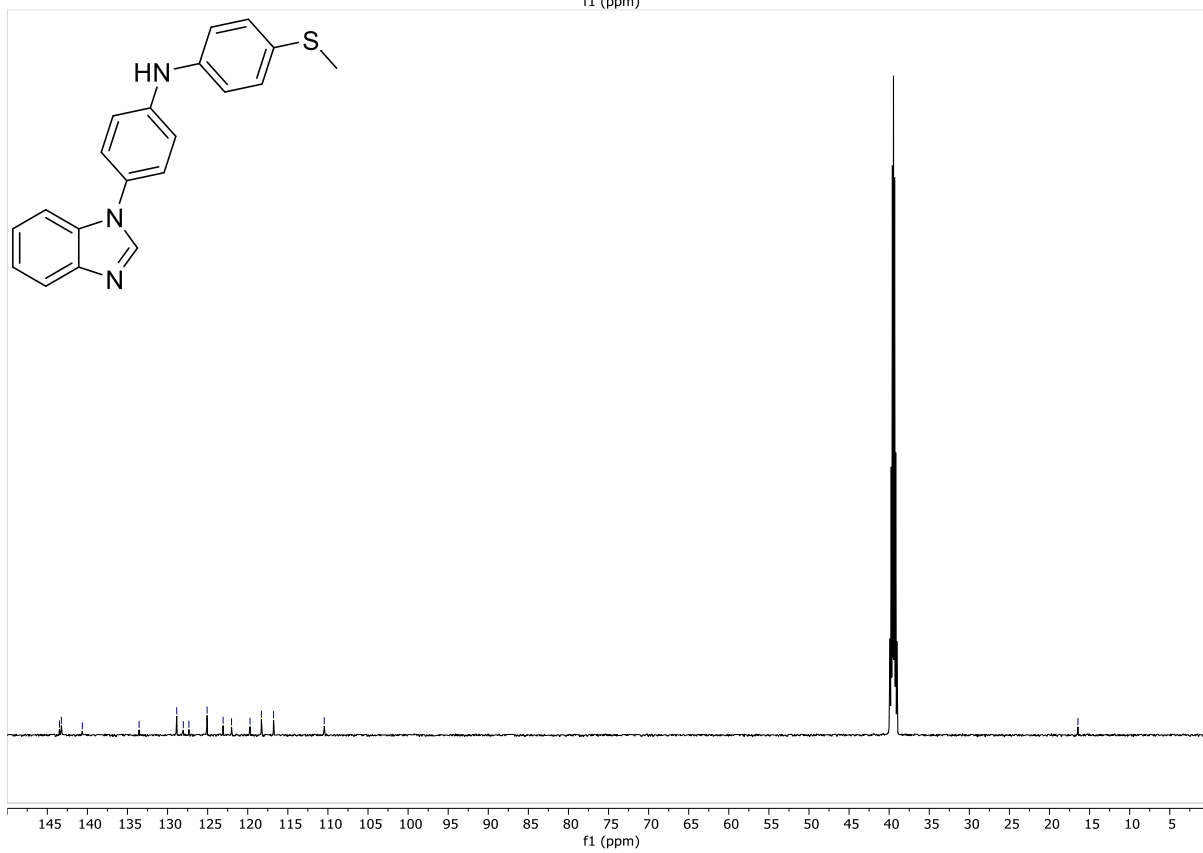

**3c**

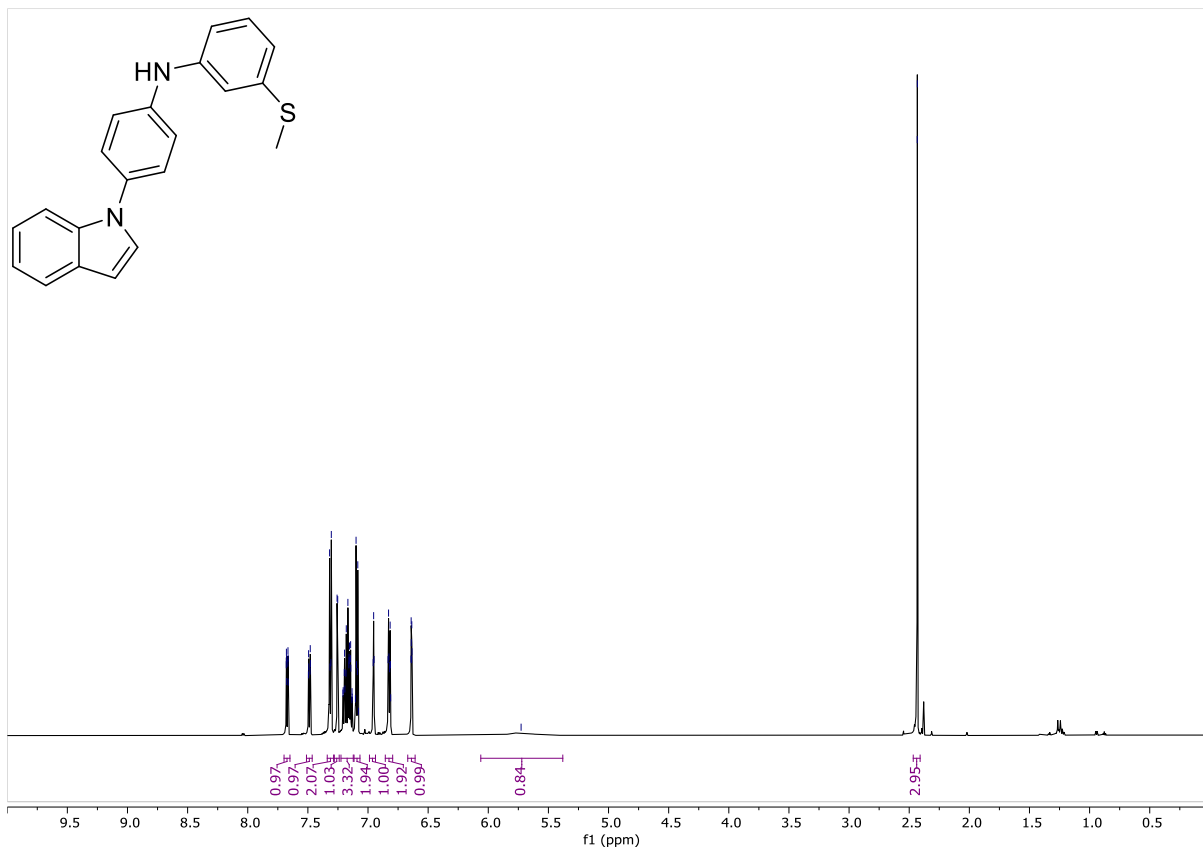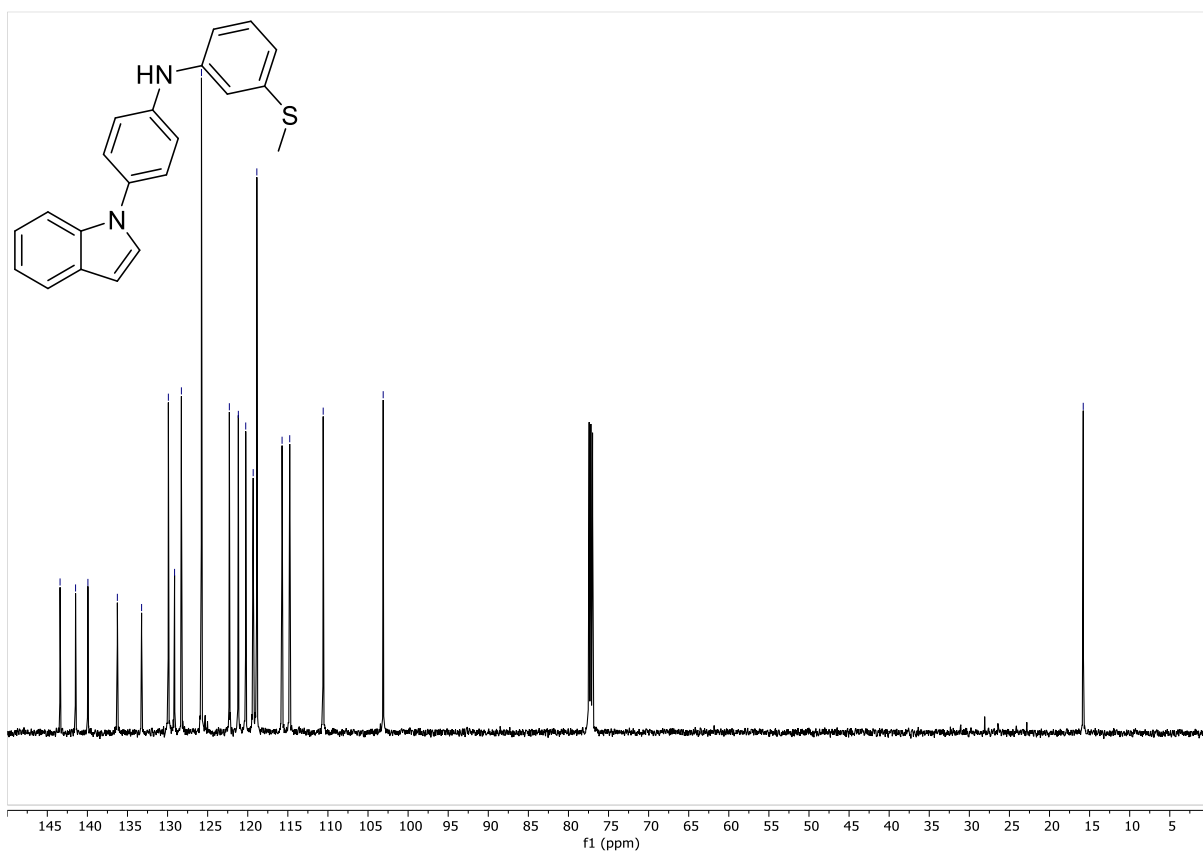

3d

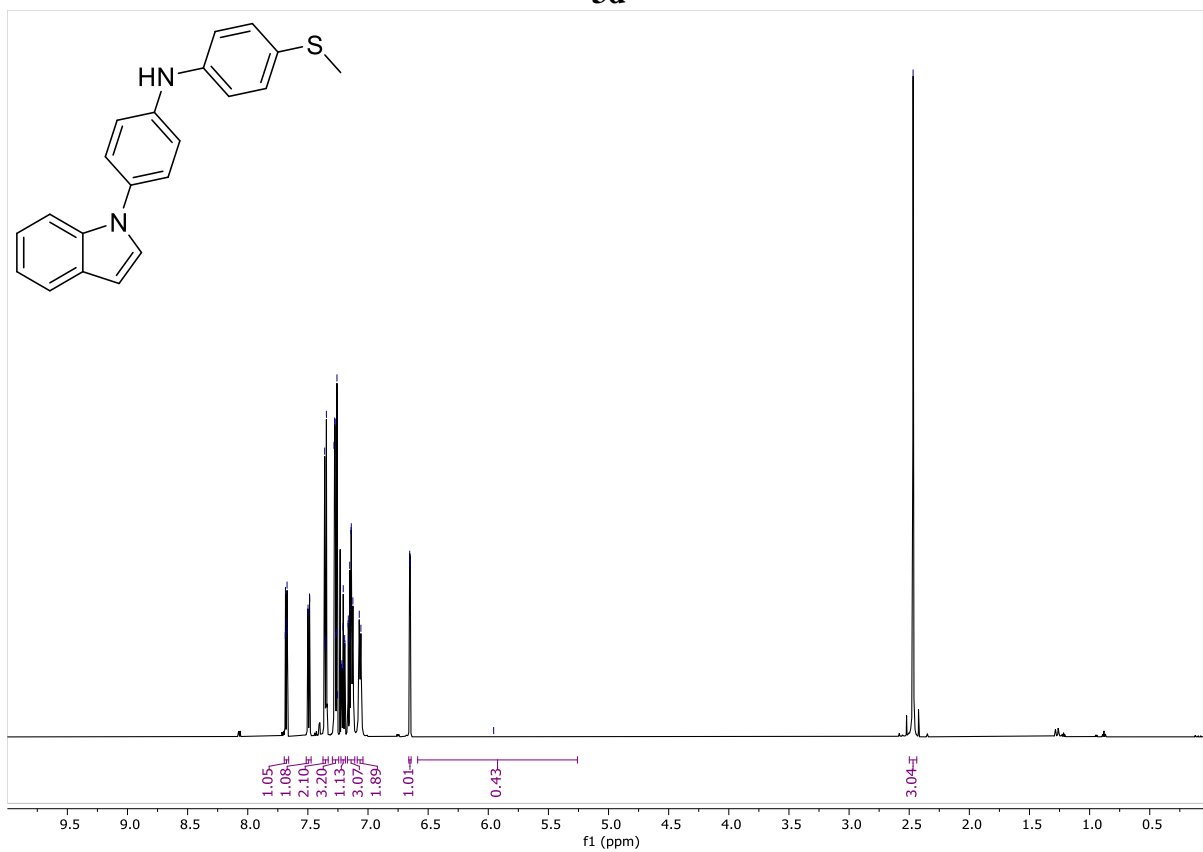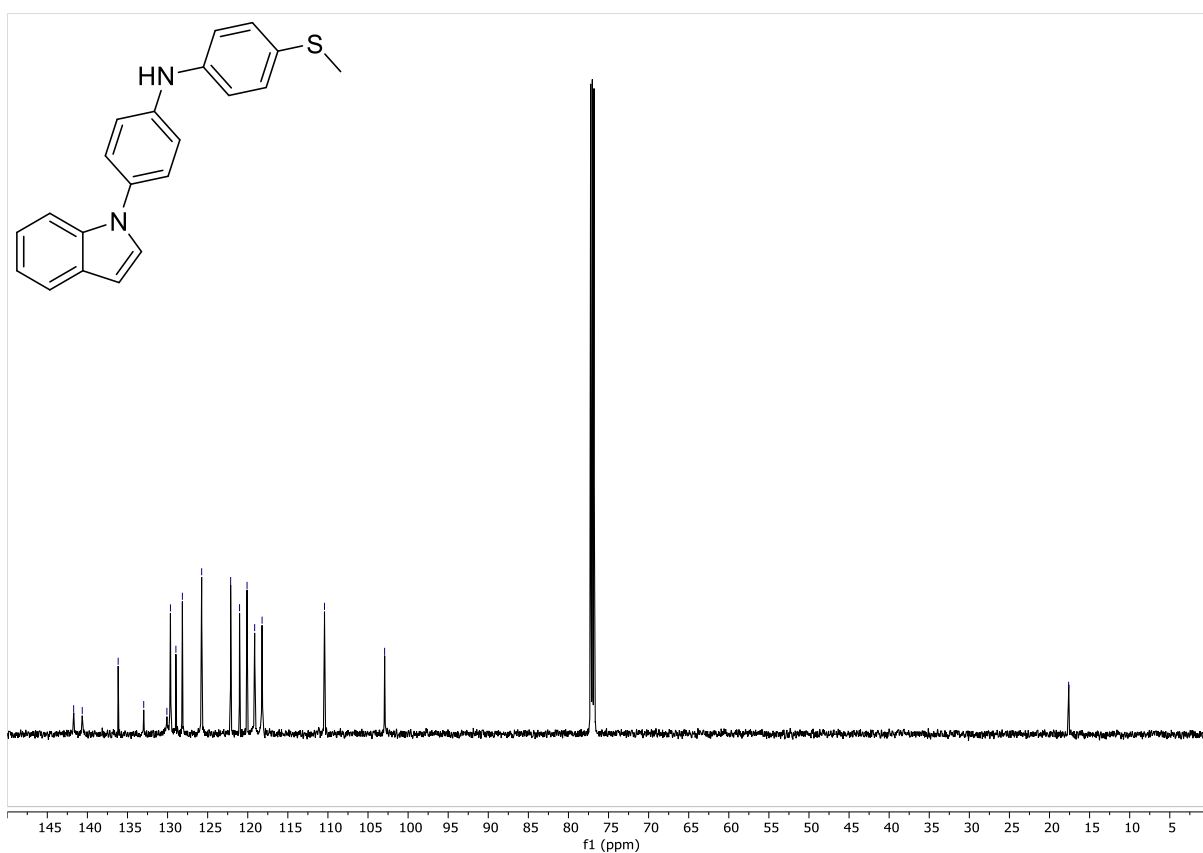

**4a**

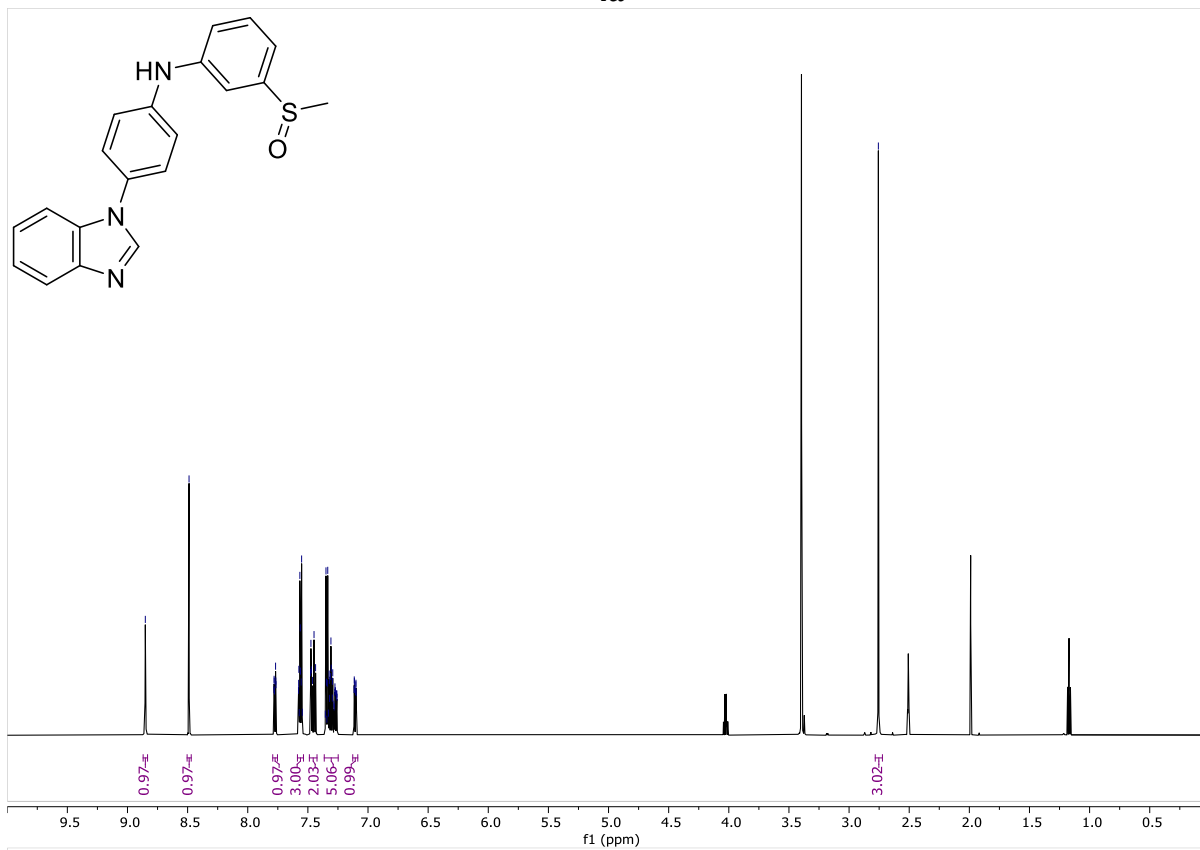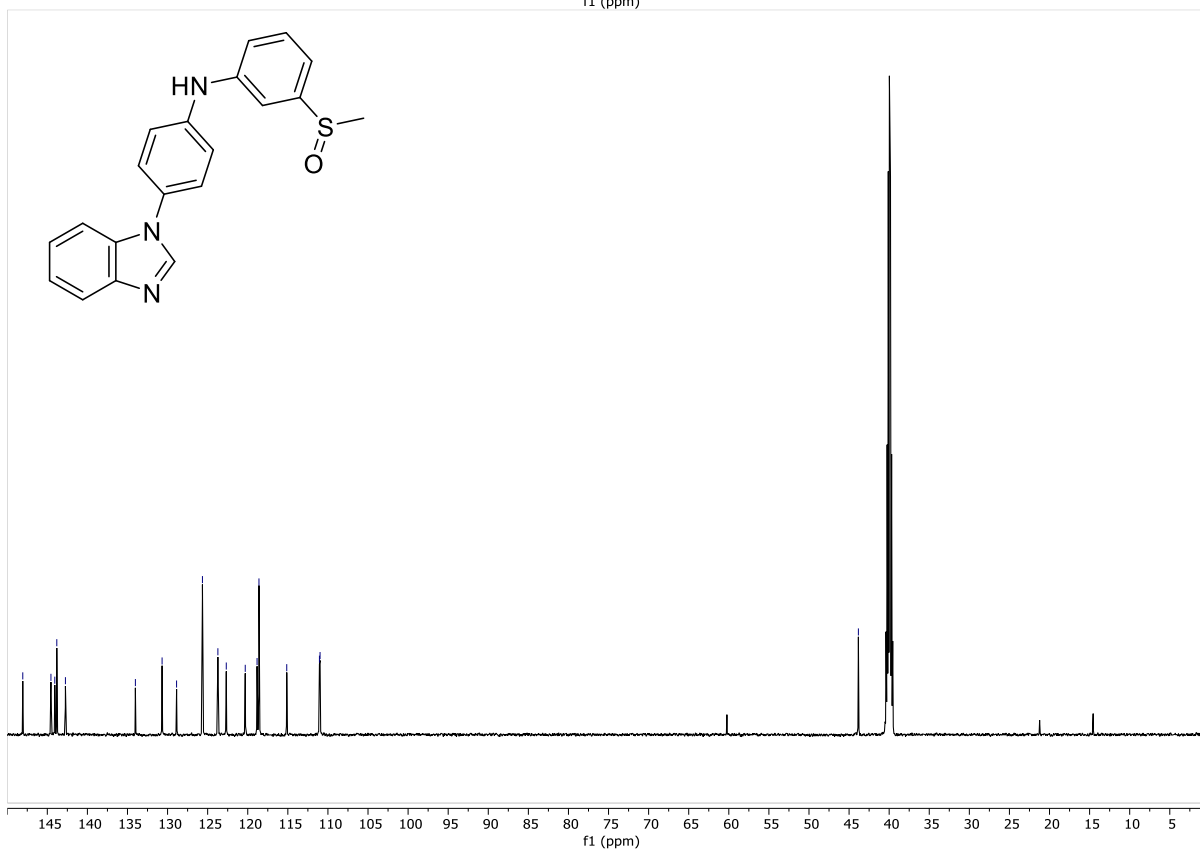

4b

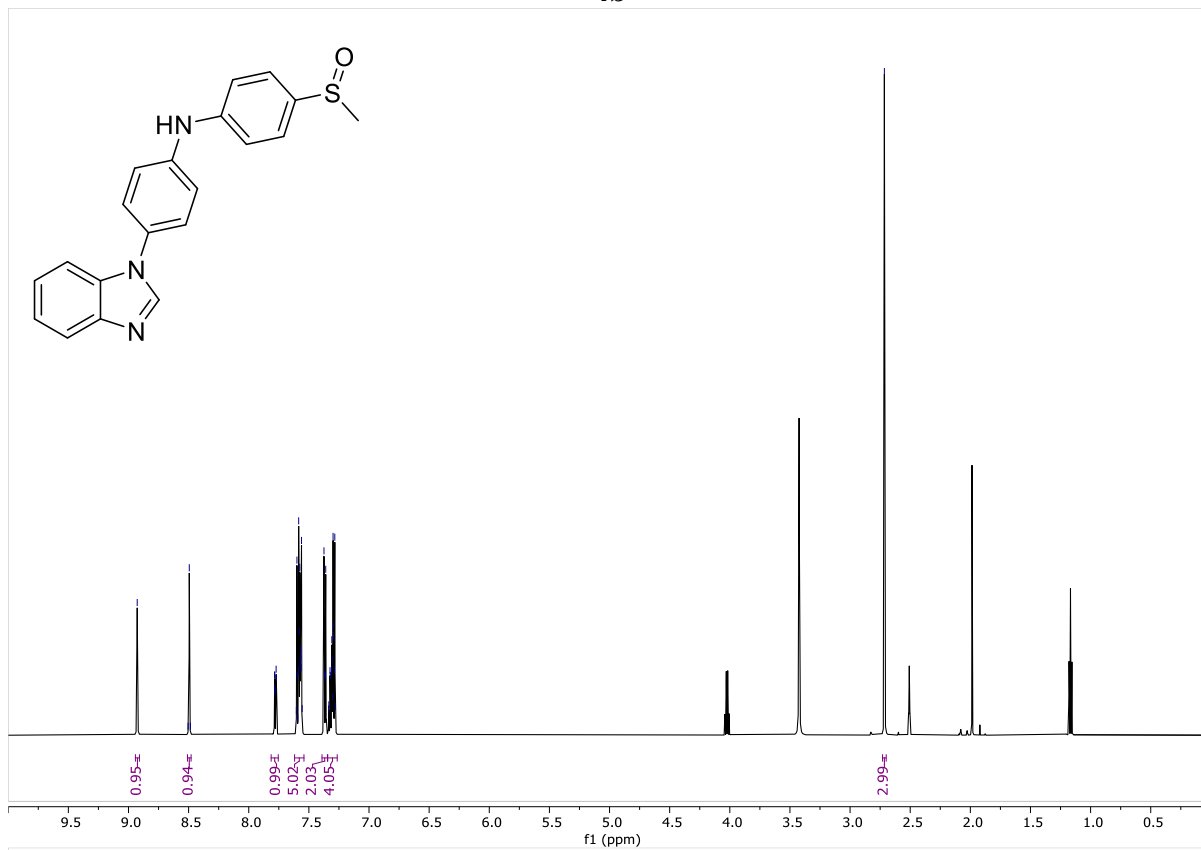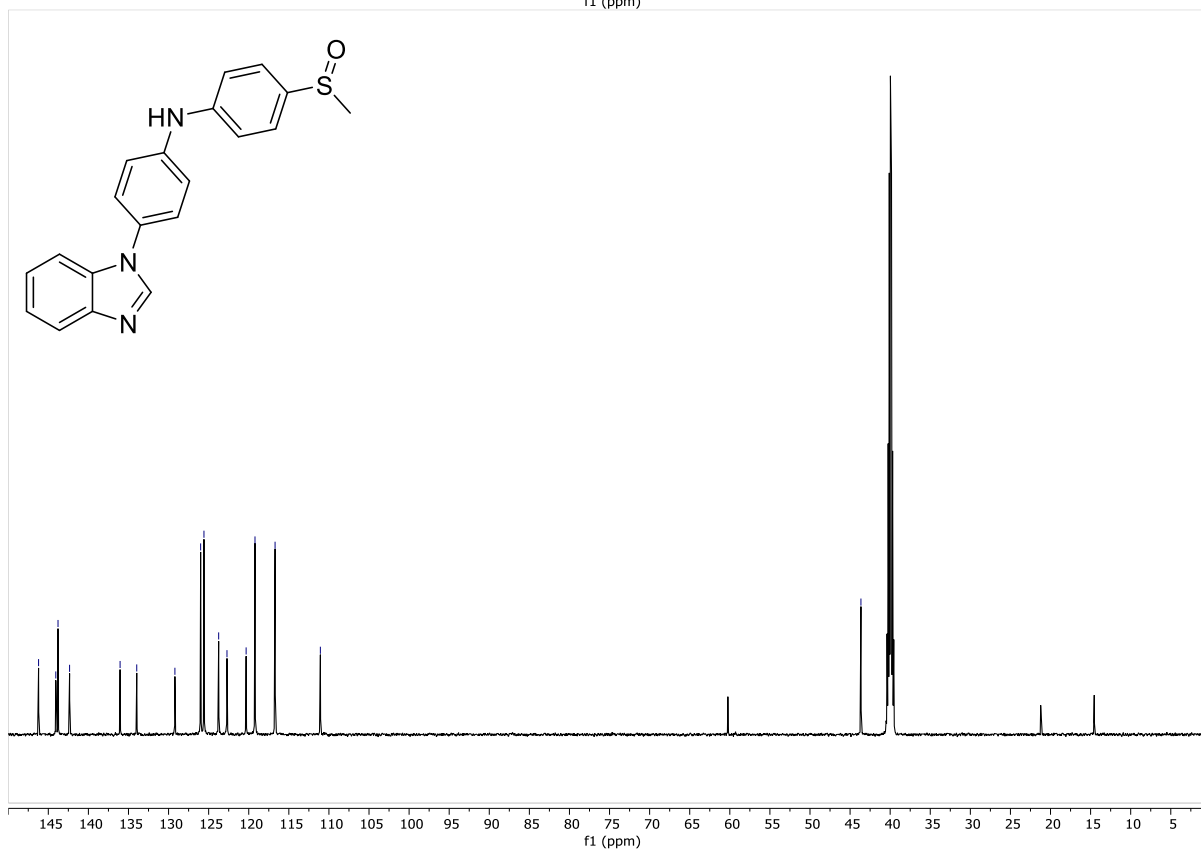

**4c**

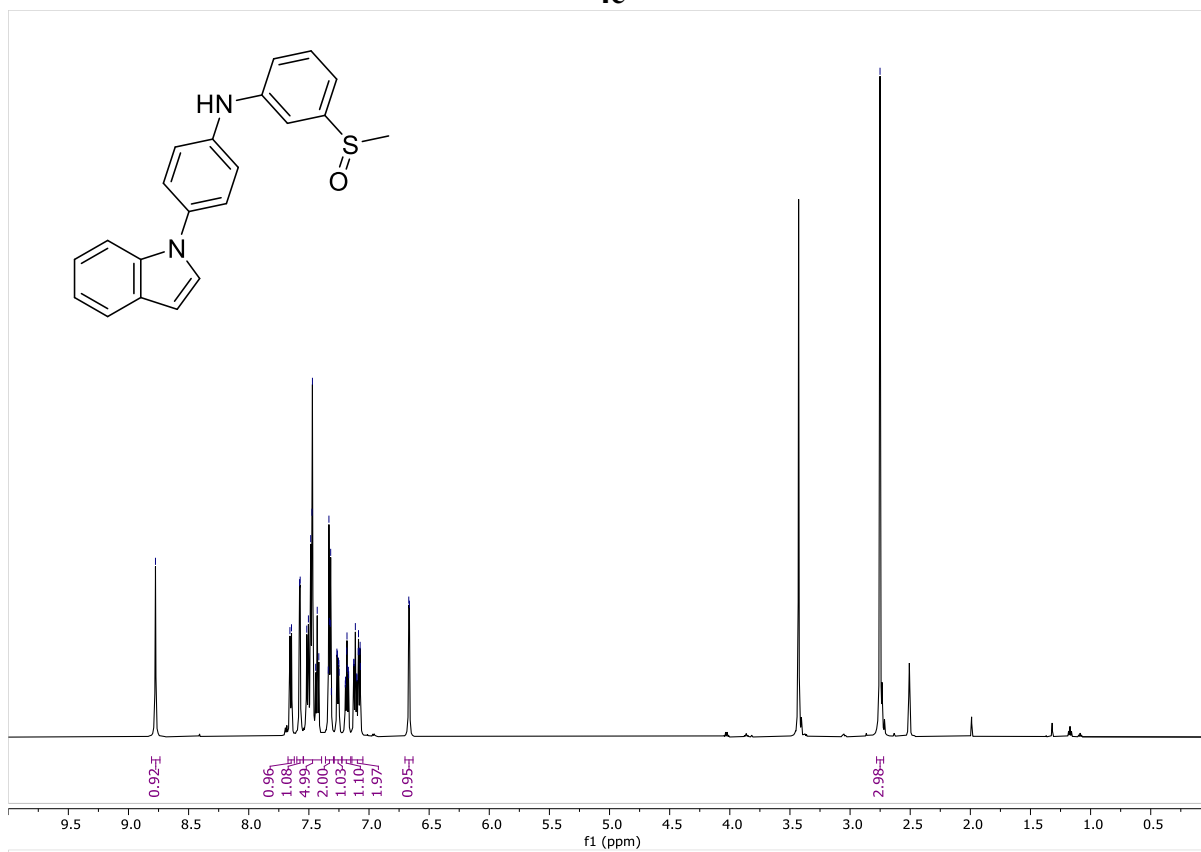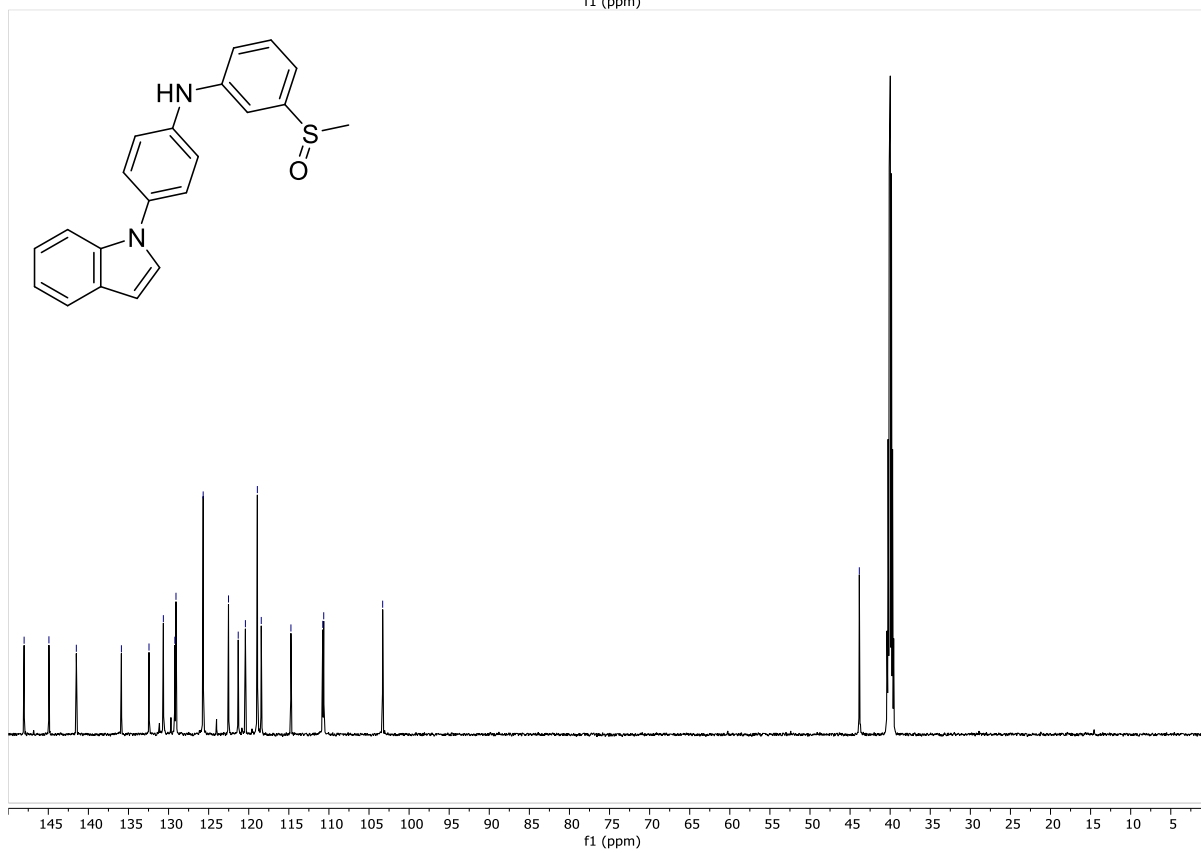



4d

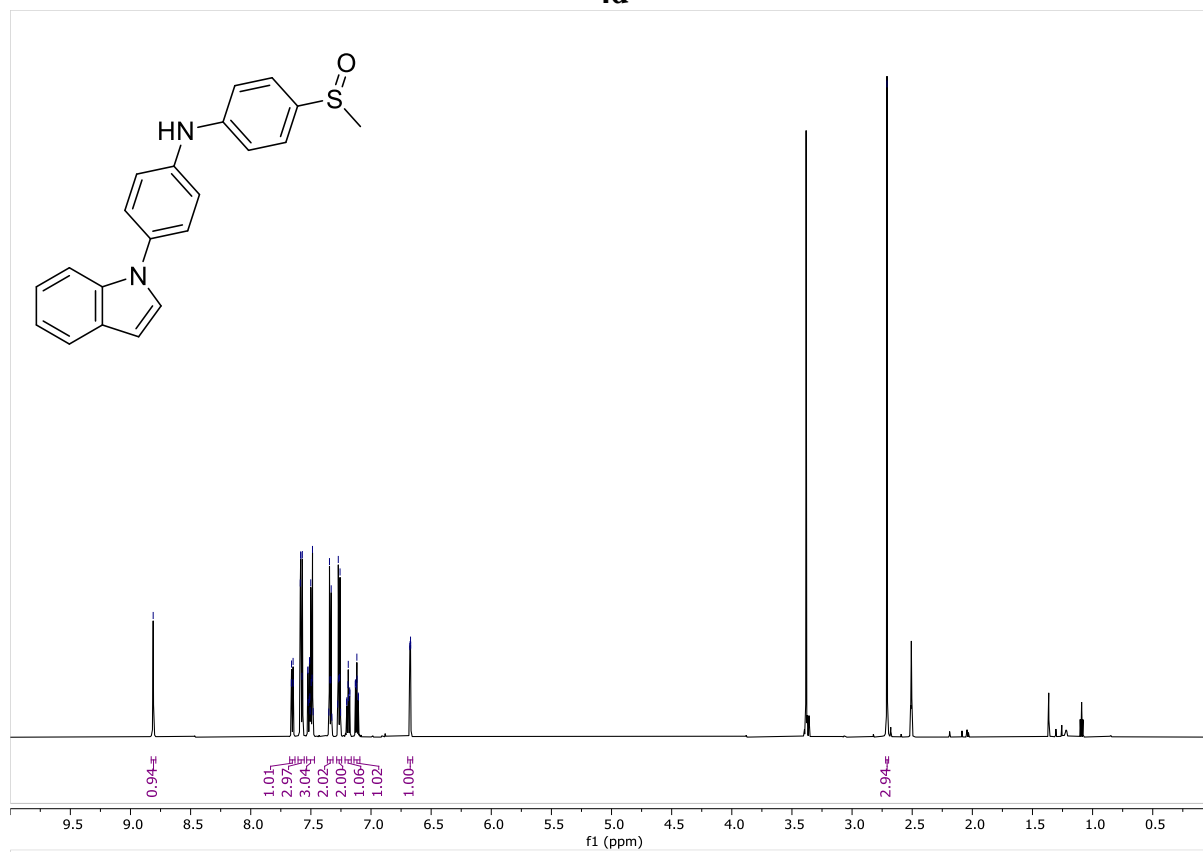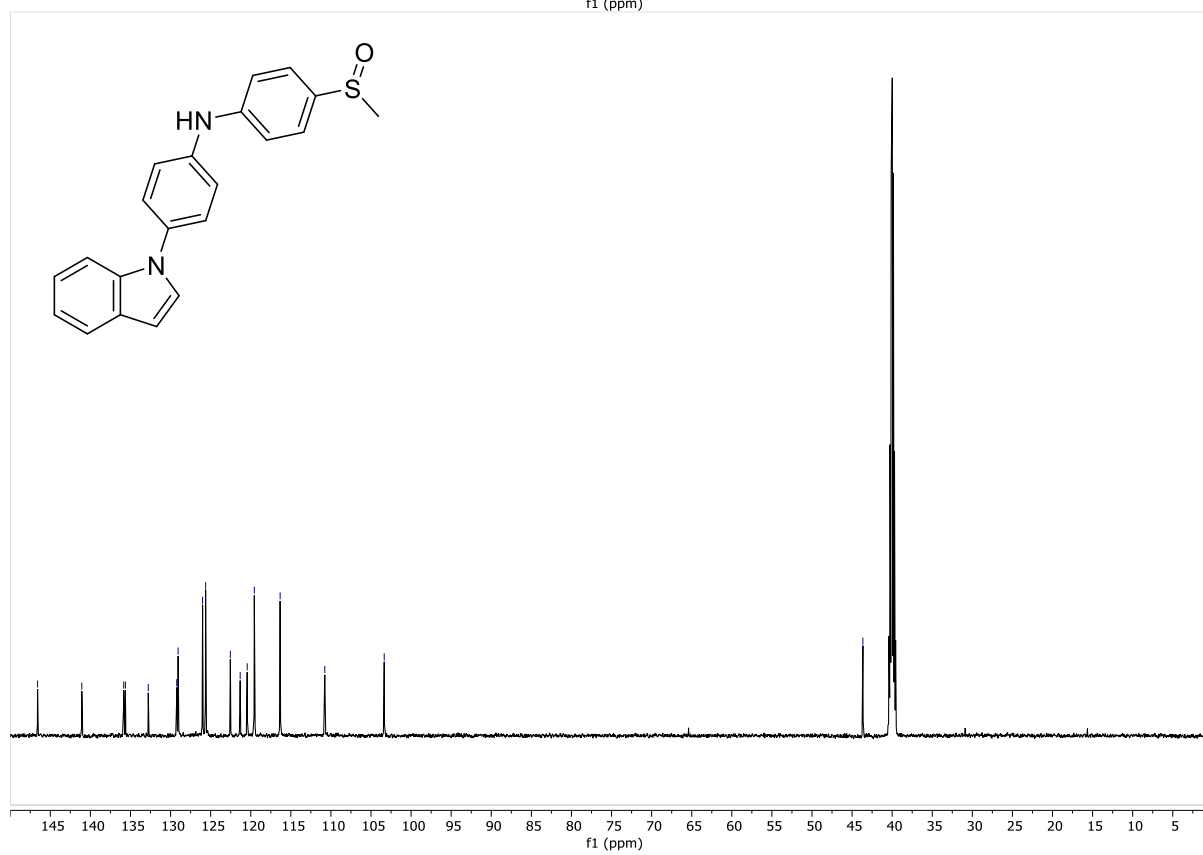

## MS data

### 3a

#### Acquisition Parameter

|             |            |                       |           |                  |            |
|-------------|------------|-----------------------|-----------|------------------|------------|
| Source Type | ESI        | Ion Polarity          | Positive  | Set Nebulizer    | 3.0 Bar    |
| Focus       | Not active | Set Capillary         | 4500 V    | Set Dry Heater   | 250 °C     |
| Scan Begin  | 50 m/z     | Set End Plate Offset  | -500 V    | Set Dry Gas      | 10.0 l/min |
| Scan End    | 1600 m/z   | Set Collision Cell RF | 100.0 Vpp | Set Divert Valve | Waste      |

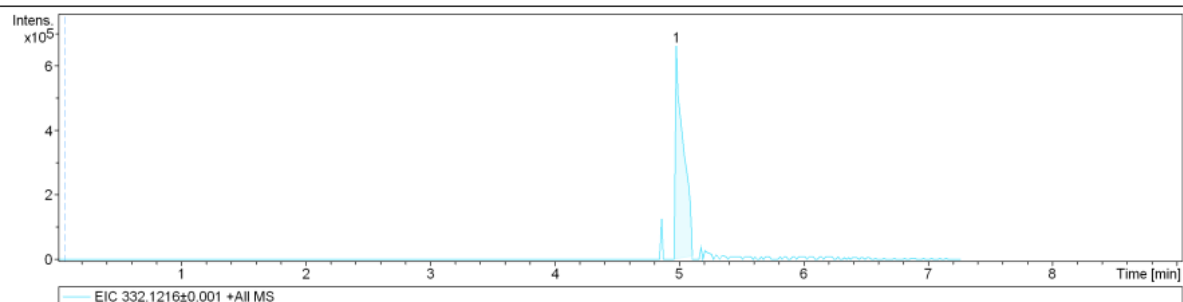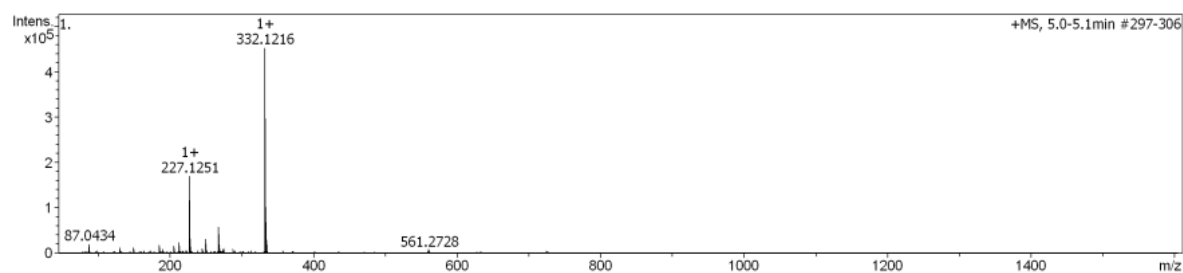

### 3b

#### Acquisition Parameter

|             |            |                       |           |                  |            |
|-------------|------------|-----------------------|-----------|------------------|------------|
| Source Type | ESI        | Ion Polarity          | Positive  | Set Nebulizer    | 3.0 Bar    |
| Focus       | Not active | Set Capillary         | 4500 V    | Set Dry Heater   | 250 °C     |
| Scan Begin  | 50 m/z     | Set End Plate Offset  | -500 V    | Set Dry Gas      | 10.0 l/min |
| Scan End    | 1600 m/z   | Set Collision Cell RF | 100.0 Vpp | Set Divert Valve | Waste      |

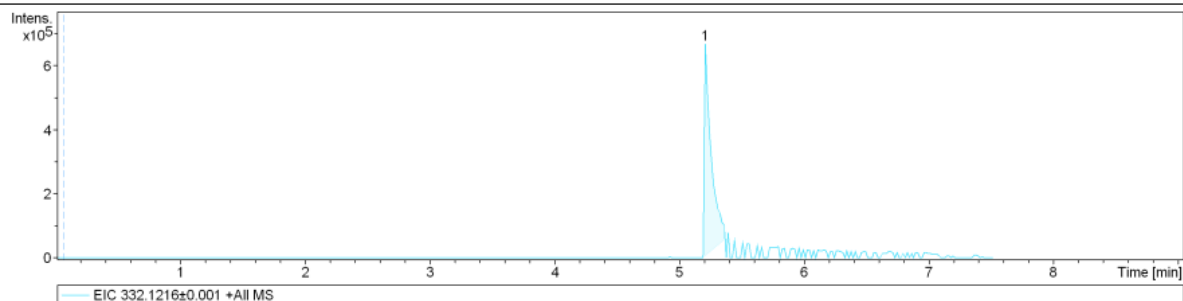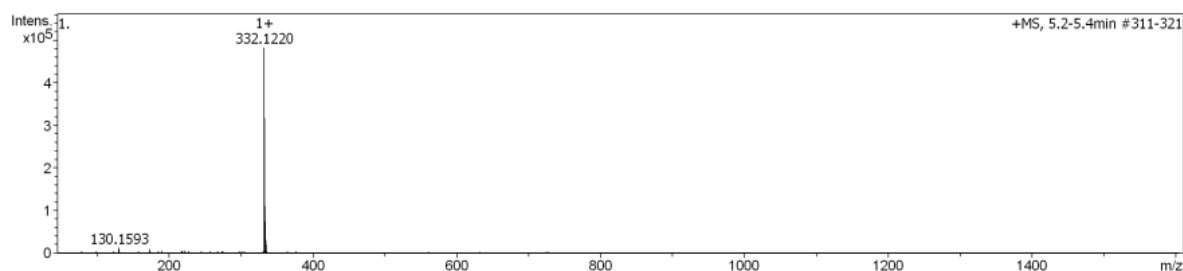

### 3c

#### Acquisition Parameter

|             |            |                       |           |                  |            |
|-------------|------------|-----------------------|-----------|------------------|------------|
| Source Type | ESI        | Ion Polarity          | Positive  | Set Nebulizer    | 3.0 Bar    |
| Focus       | Not active | Set Capillary         | 4500 V    | Set Dry Heater   | 250 °C     |
| Scan Begin  | 50 m/z     | Set End Plate Offset  | -500 V    | Set Dry Gas      | 10.0 l/min |
| Scan End    | 1600 m/z   | Set Collision Cell RF | 100.0 Vpp | Set Divert Valve | Waste      |

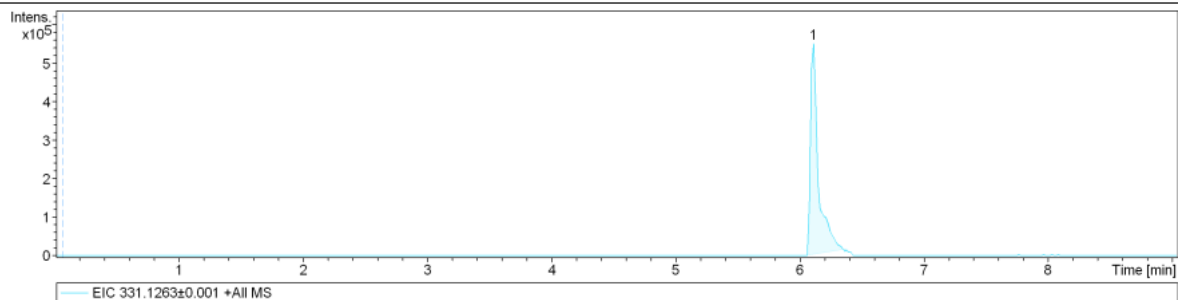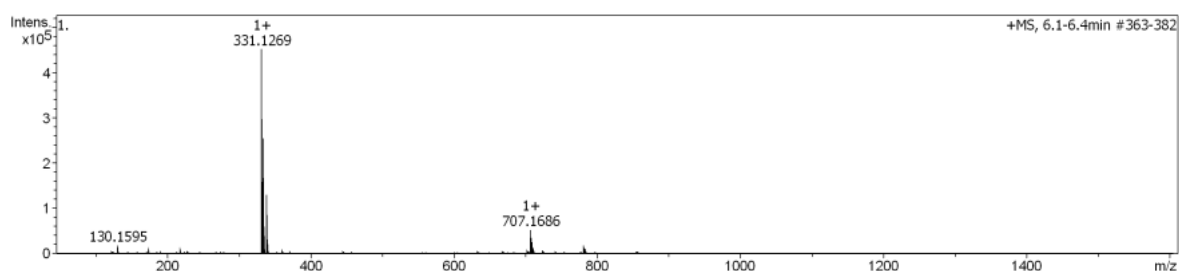

### 3d

#### Acquisition Parameter

|             |            |                       |           |                  |            |
|-------------|------------|-----------------------|-----------|------------------|------------|
| Source Type | ESI        | Ion Polarity          | Positive  | Set Nebulizer    | 3.0 Bar    |
| Focus       | Not active | Set Capillary         | 4500 V    | Set Dry Heater   | 250 °C     |
| Scan Begin  | 50 m/z     | Set End Plate Offset  | -500 V    | Set Dry Gas      | 10.0 l/min |
| Scan End    | 1600 m/z   | Set Collision Cell RF | 100.0 Vpp | Set Divert Valve | Waste      |

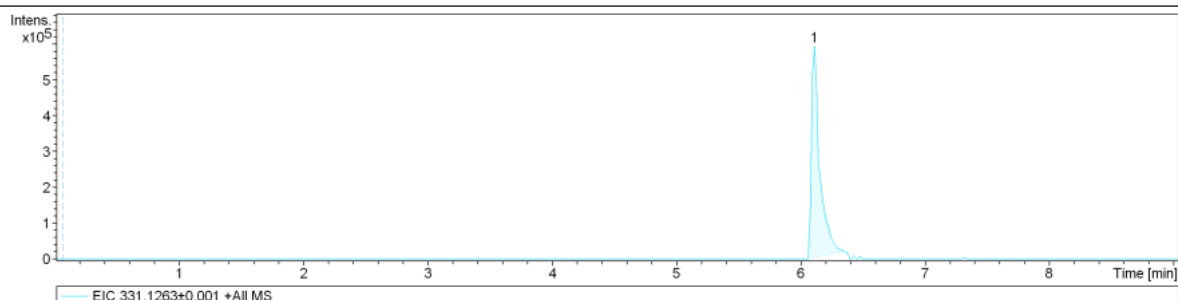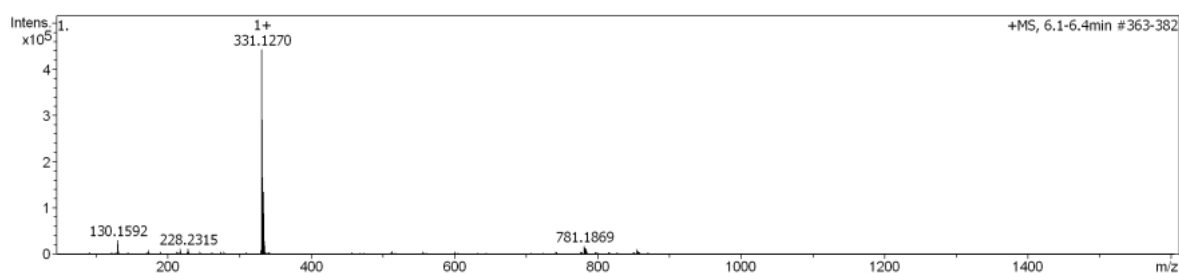

## 4a

### Acquisition Parameter

|             |            |                       |           |                  |            |
|-------------|------------|-----------------------|-----------|------------------|------------|
| Source Type | ESI        | Ion Polarity          | Positive  | Set Nebulizer    | 3.0 Bar    |
| Focus       | Not active | Set Capillary         | 4500 V    | Set Dry Heater   | 250 °C     |
| Scan Begin  | 50 m/z     | Set End Plate Offset  | -500 V    | Set Dry Gas      | 10.0 l/min |
| Scan End    | 1600 m/z   | Set Collision Cell RF | 100.0 Vpp | Set Divert Valve | Waste      |

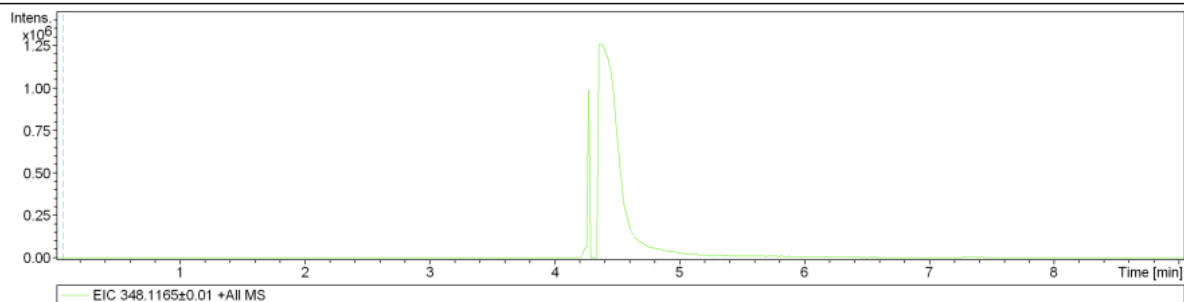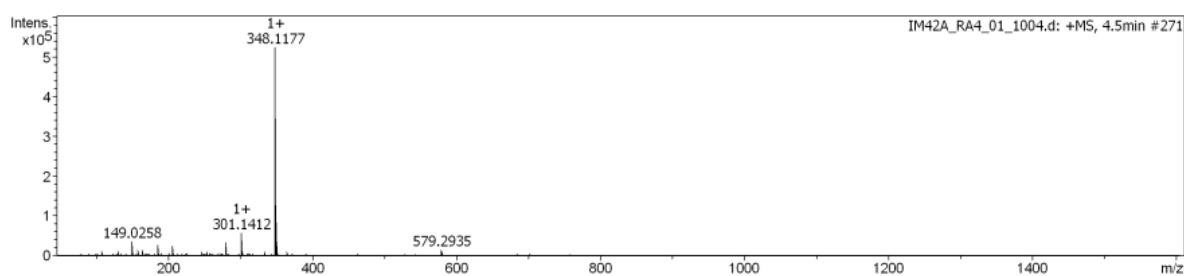

## 4b

### Acquisition Parameter

|             |            |                       |           |                  |            |
|-------------|------------|-----------------------|-----------|------------------|------------|
| Source Type | ESI        | Ion Polarity          | Positive  | Set Nebulizer    | 3.0 Bar    |
| Focus       | Not active | Set Capillary         | 4500 V    | Set Dry Heater   | 250 °C     |
| Scan Begin  | 50 m/z     | Set End Plate Offset  | -500 V    | Set Dry Gas      | 10.0 l/min |
| Scan End    | 1600 m/z   | Set Collision Cell RF | 100.0 Vpp | Set Divert Valve | Waste      |

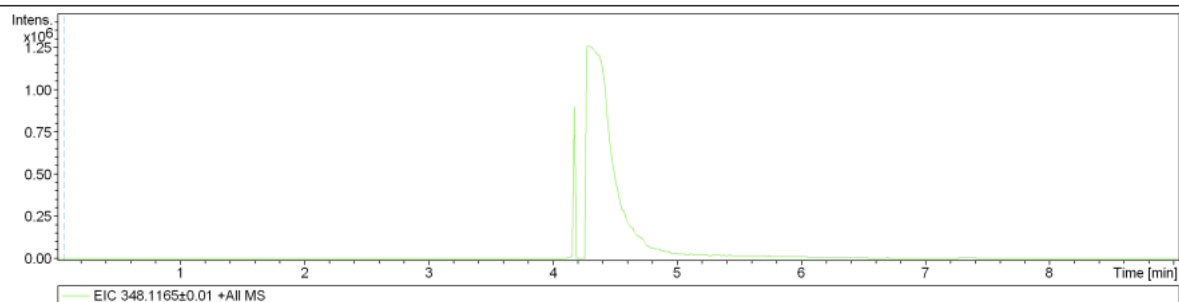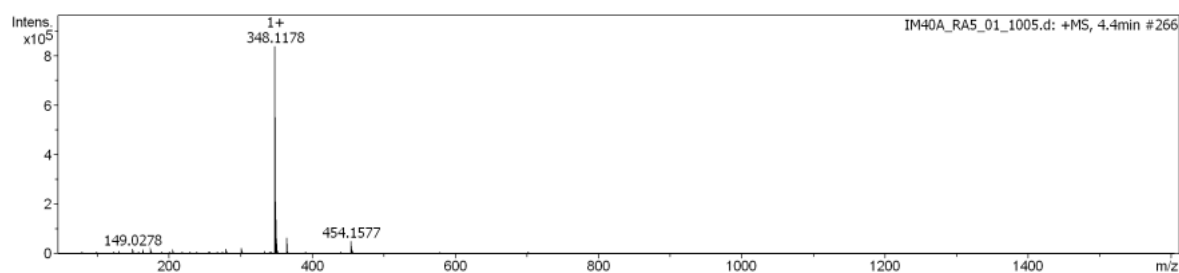

## 4c

### Acquisition Parameter

|             |            |                       |           |                  |            |
|-------------|------------|-----------------------|-----------|------------------|------------|
| Source Type | ESI        | Ion Polarity          | Positive  | Set Nebulizer    | 3.0 Bar    |
| Focus       | Not active | Set Capillary         | 4500 V    | Set Dry Heater   | 250 °C     |
| Scan Begin  | 50 m/z     | Set End Plate Offset  | -500 V    | Set Dry Gas      | 10.0 l/min |
| Scan End    | 1600 m/z   | Set Collision Cell RF | 100.0 Vpp | Set Divert Valve | Waste      |

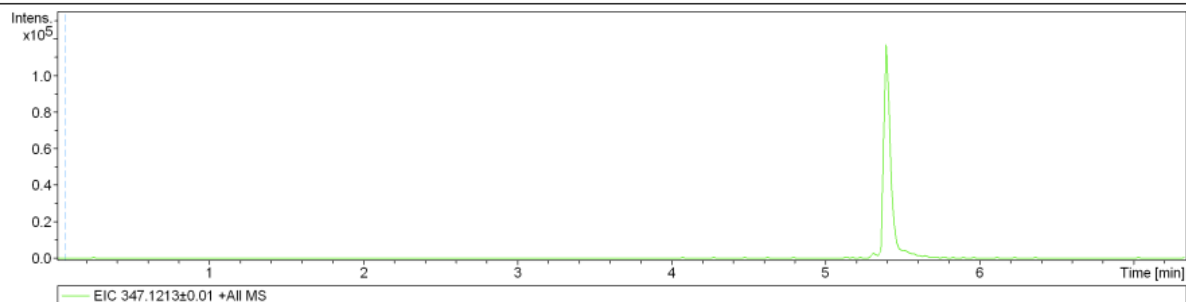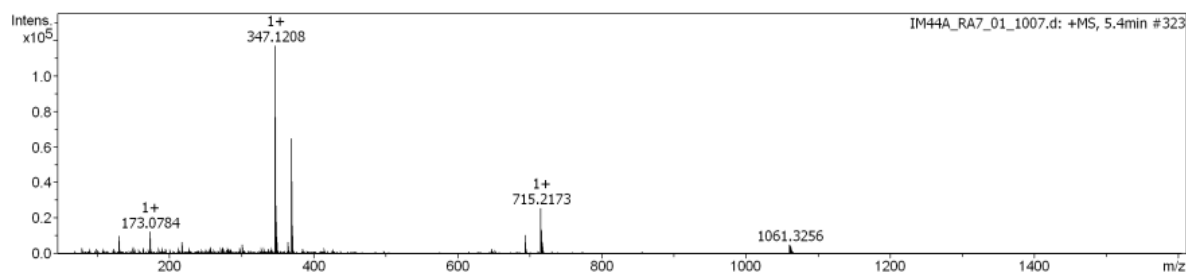

## 4d

### Acquisition Parameter

|             |            |                       |           |                  |            |
|-------------|------------|-----------------------|-----------|------------------|------------|
| Source Type | ESI        | Ion Polarity          | Positive  | Set Nebulizer    | 3.0 Bar    |
| Focus       | Not active | Set Capillary         | 4500 V    | Set Dry Heater   | 250 °C     |
| Scan Begin  | 50 m/z     | Set End Plate Offset  | -500 V    | Set Dry Gas      | 10.0 l/min |
| Scan End    | 1600 m/z   | Set Collision Cell RF | 100.0 Vpp | Set Divert Valve | Waste      |

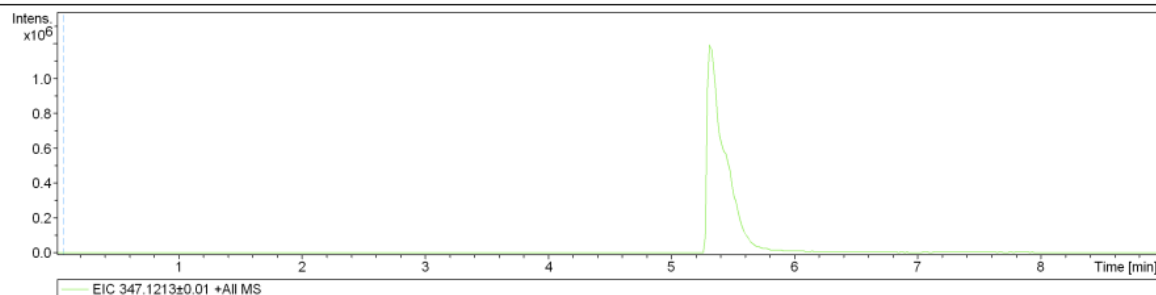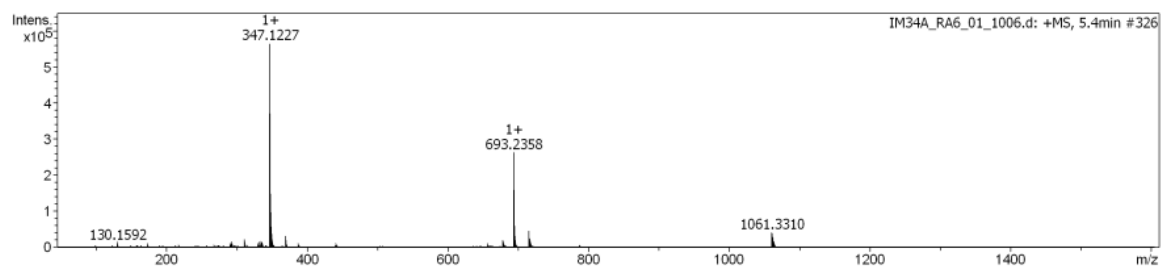

## HPLC data

3a

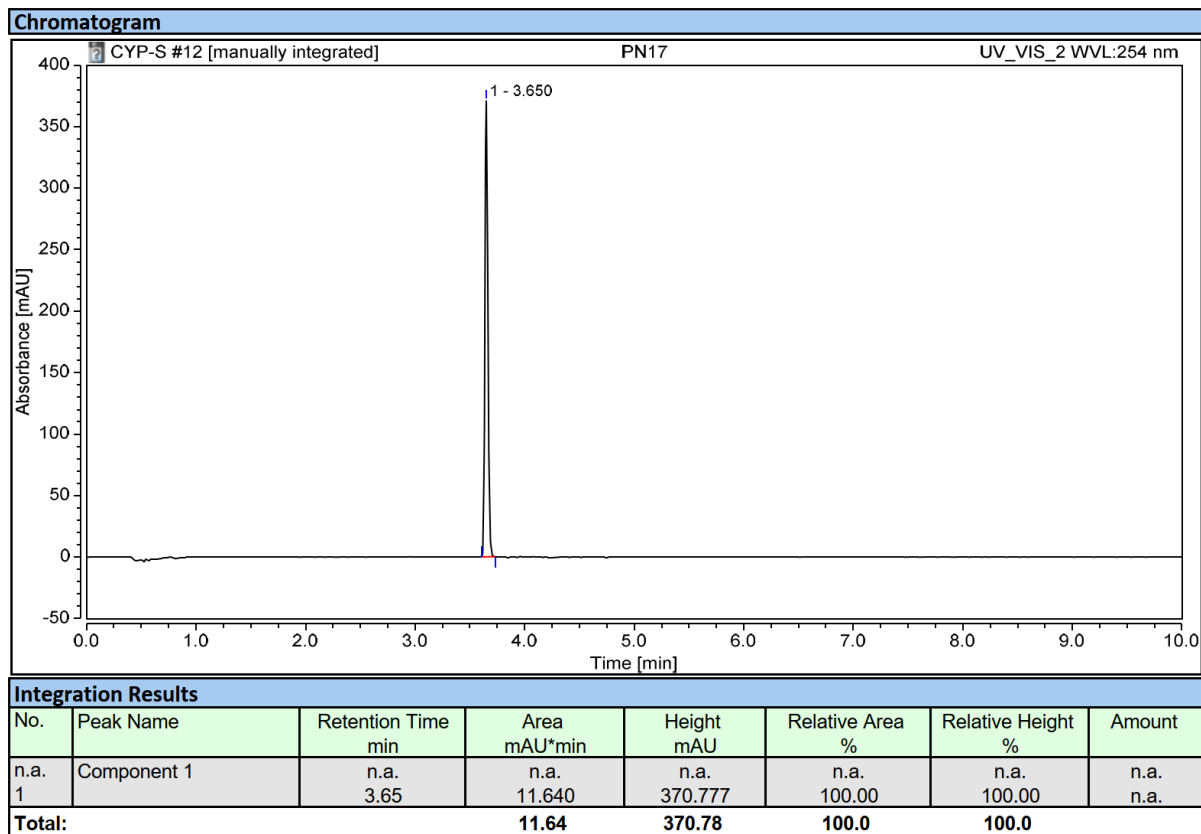

3b

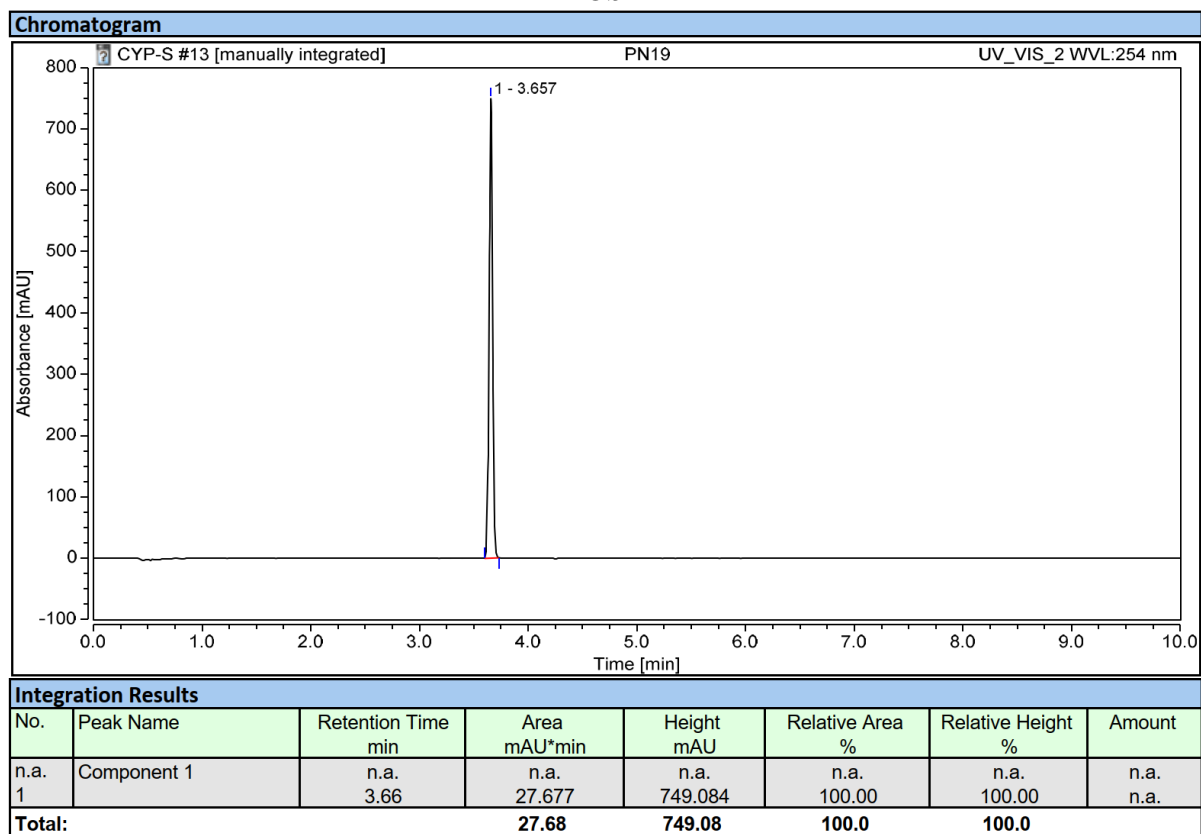

3c

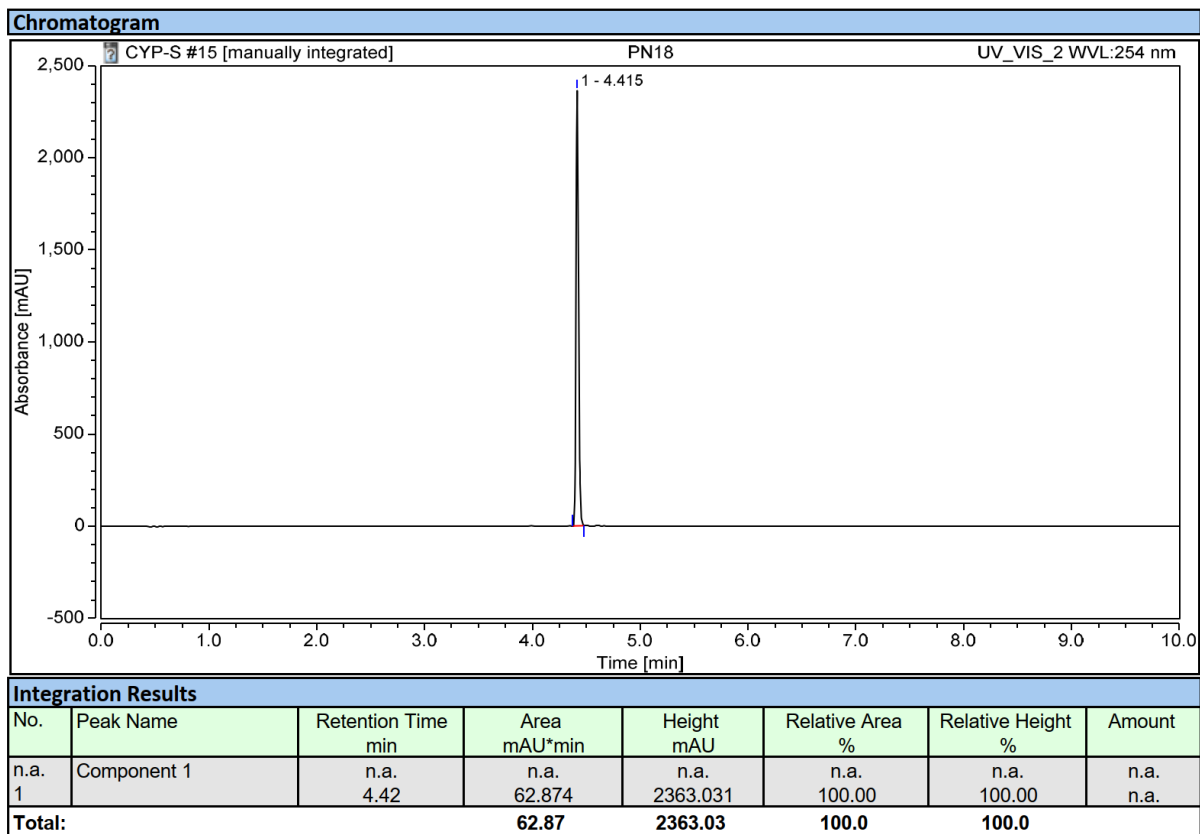

3d

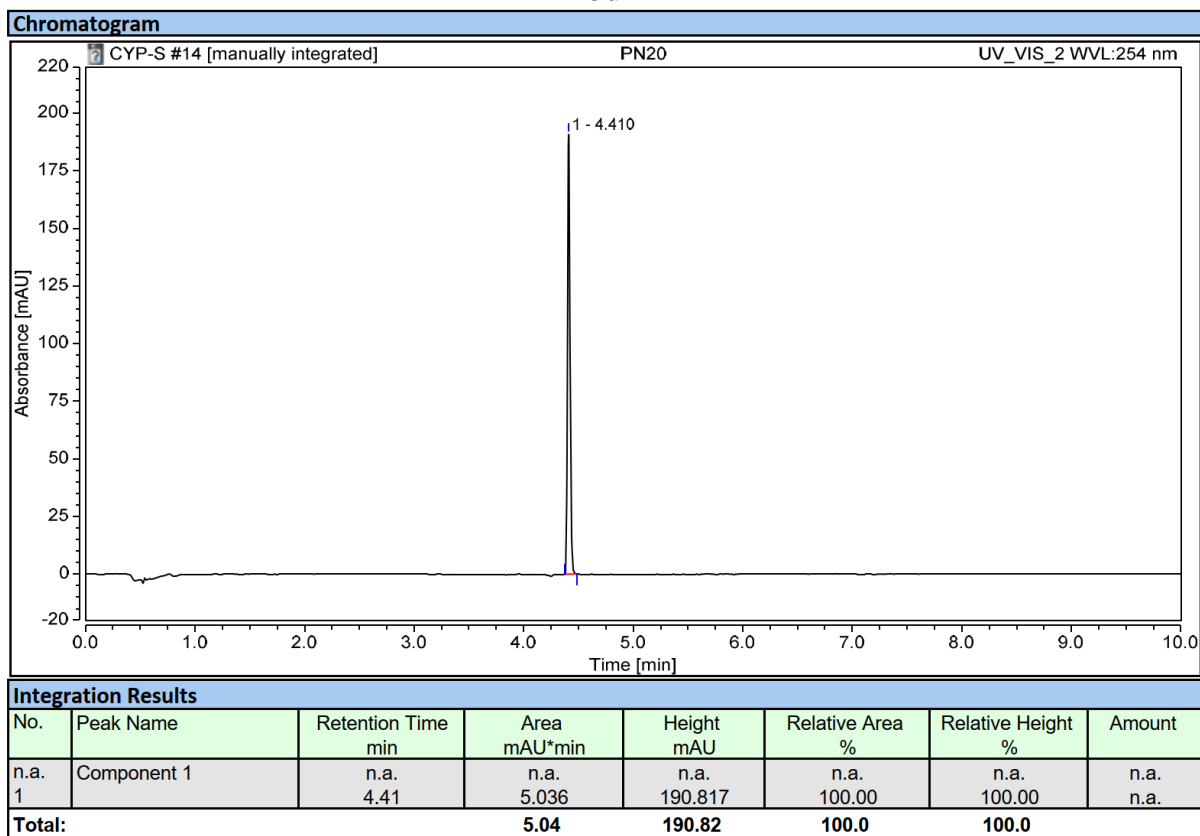

4a

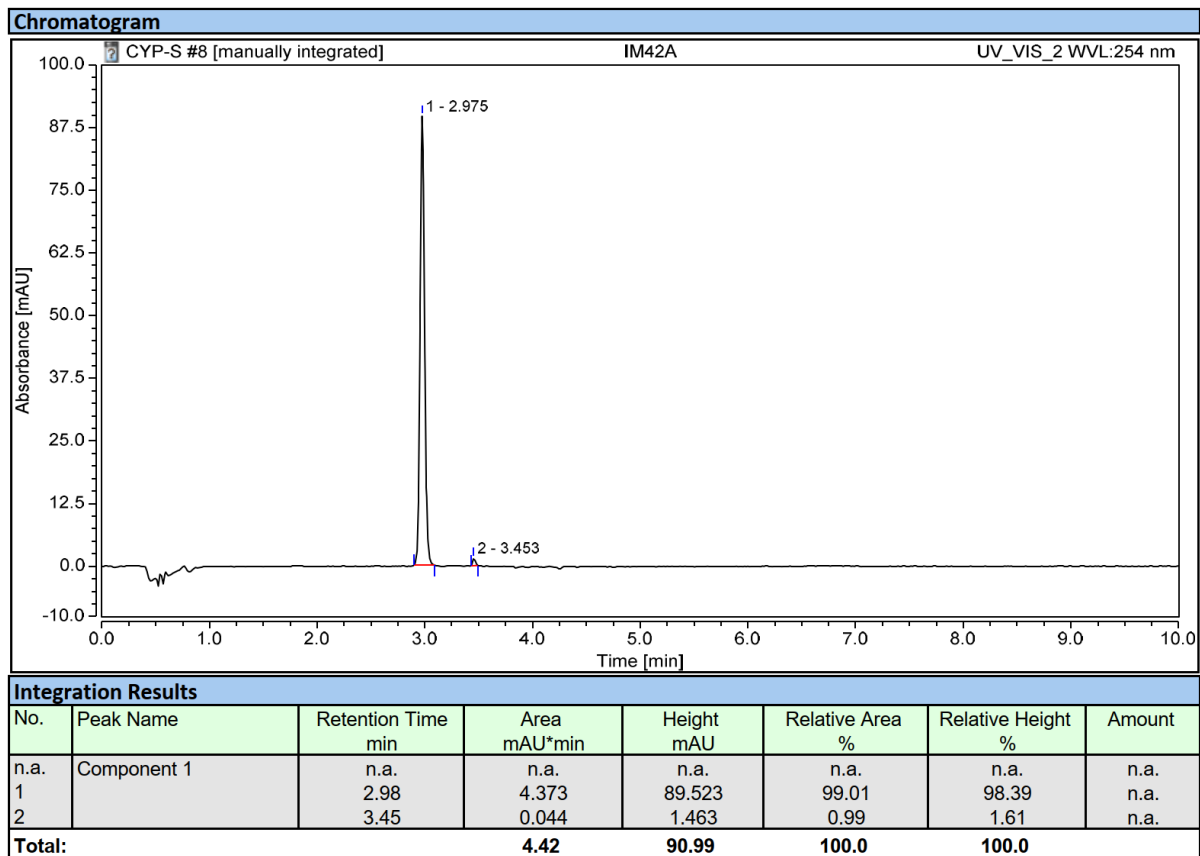

4b

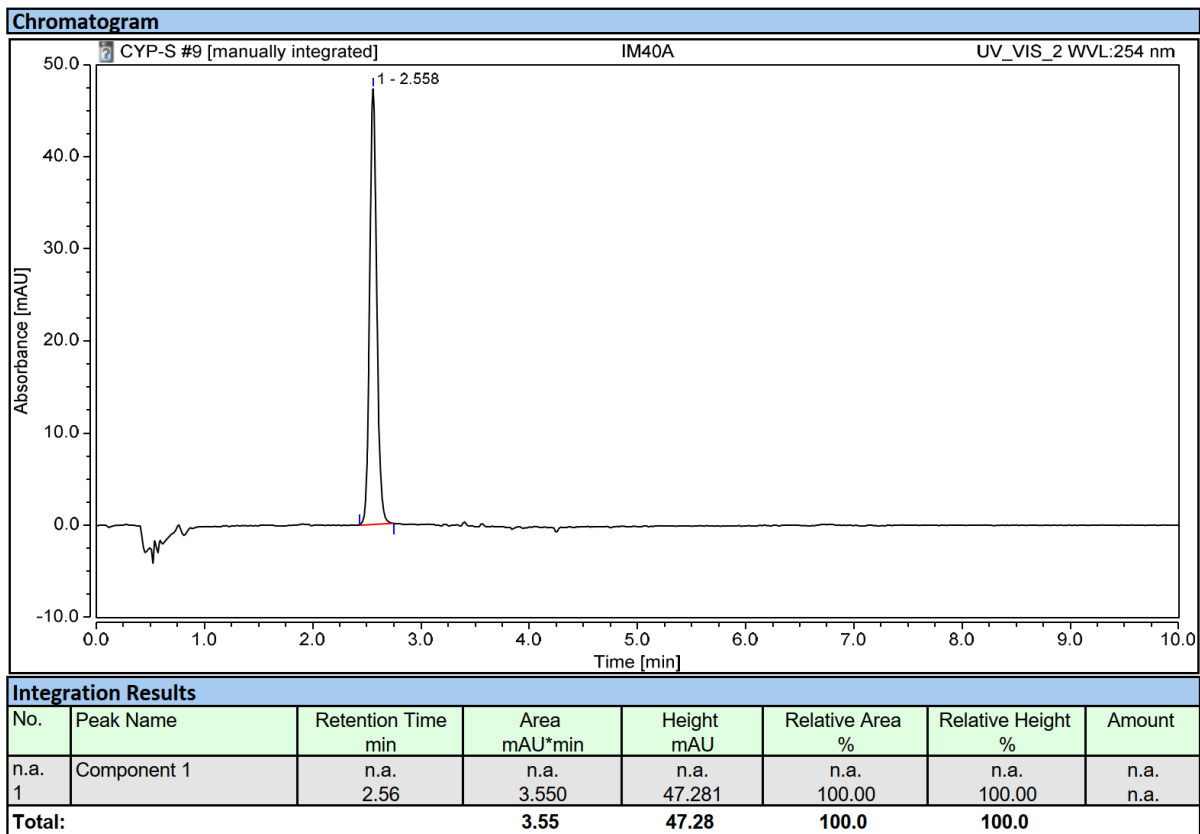



4c

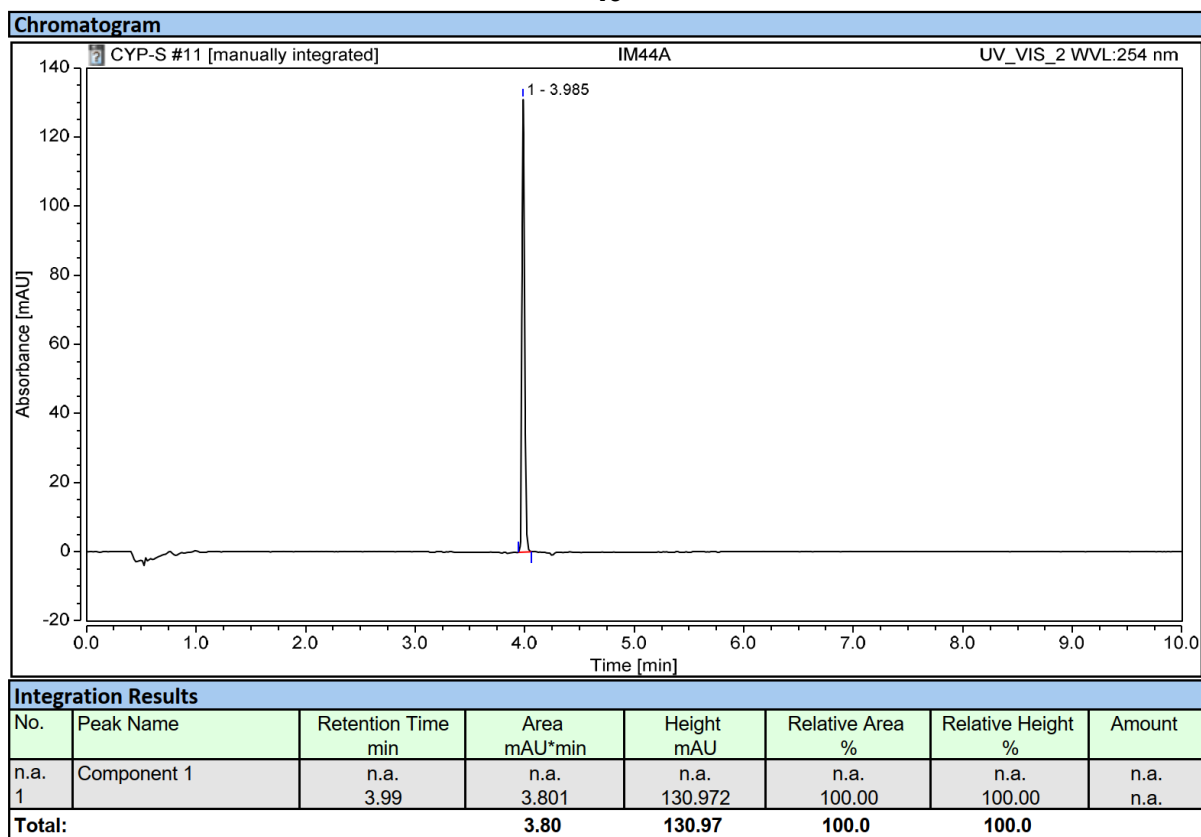

4d

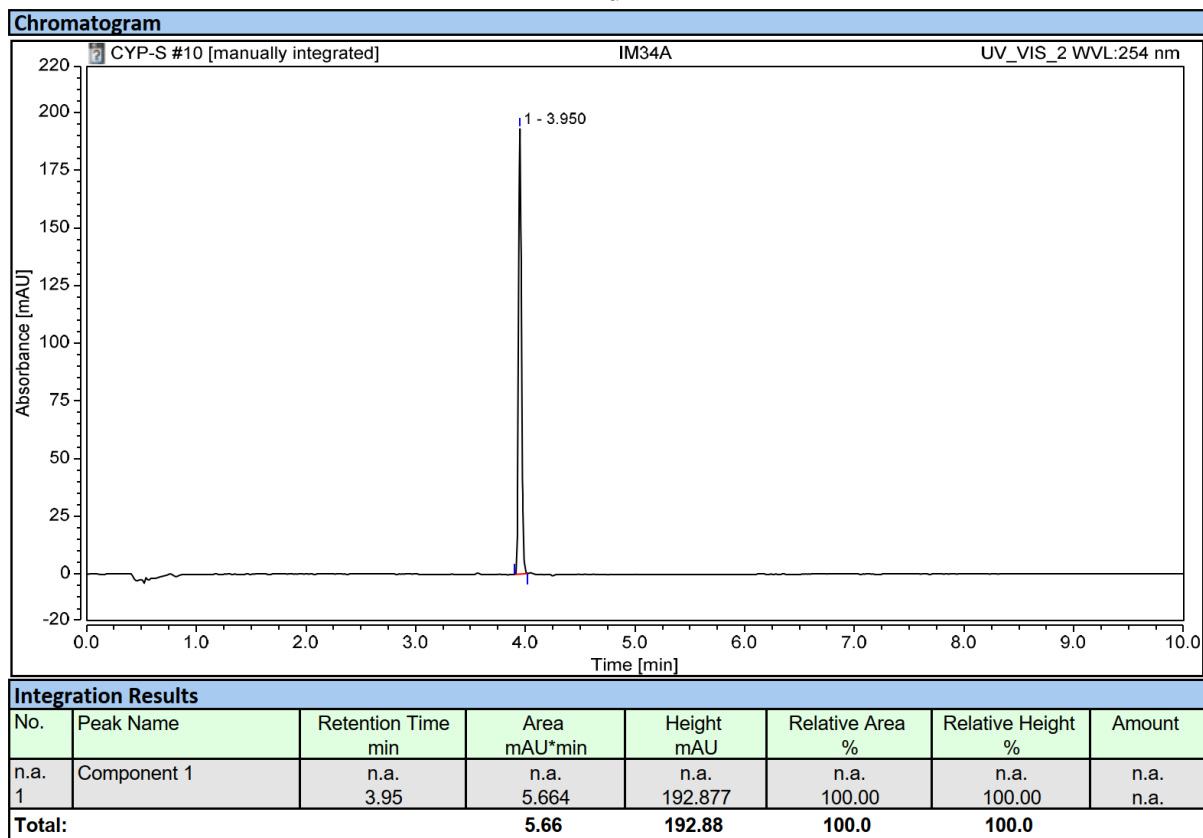

Supplement: s1 [file s1]
